# Supplementary material for: Processing and Nutritional Quality of Breakfast Cereals Sold in Italy: Results from the Food Labelling of Italian Products (FLIP) Study
Source: MDPI journal article supplement (doi:10.3390/nu15082013), 2023-04-21
Supplement: s1 [file s1]

**Supplementary Table S1.** Energy, nutrients and salt content of retrieved breakfast cereals, stratified based on the presence of whole grain ingredients and the NOVA group.

|     | NOVA   | Energy<br>(kJ/100 g) | Energy<br>(kcal/100 g) | Total Fat<br>(g/100 g) | Sfa<br>(g/100 g) | Carbohydrates<br>(g/100 g) | Sugar<br>(g/100 g) | Fibre<br>(g/100 g) | Protein<br>(g/100 g) | Salt<br>(g/100 g) |
|-----|--------|----------------------|------------------------|------------------------|------------------|----------------------------|--------------------|--------------------|----------------------|-------------------|
| RG  | NOVA 1 | 1555 (1523-1601)b    | 369 (360-378)b         | 3.1 (2.0-7.0)a         | 0.6 (0.4-1.2)b   | 64.3 (59.0-74.0)b          | 0.9 (0.5-1.4)c     | 8.4 (3.7-10.0)a    | 11.8 (9.2-13.0)a     | 0.0 (0.0-0.0)b    |
|     | NOVA 3 | 1593 (1570-1620)b    | 375 (371-382)b         | 1.0 (1.0-1.6)b         | 0.3 (0.2-0.8)b   | 81.0 (81.0-83.4)a          | 8.3 (6.1-22.0)b    | 3.2 (2.8-4.0)b     | 8.0 (7.0-8.5)b       | 0.8 (0.3-1.9)a    |
|     | NOVA 4 | 1664 (1609-1851)a    | 393 (380-441)a         | 5.1 (2.5-15.0)a        | 1.6 (0.6-4.2)a   | 71.0 (62.0-81.0)b          | 22.0 (10.0-27.0)a  | 4.9 (3.2-7.7)b     | 8.0 (6.9-9.9)b       | 0.5 (0.1-1.0)a    |
| PWG | NOVA 1 | 1317 (1291-1429)b    | 315 (309-340)b         | 4.5 (3.8-5.0)a         | 0.8 (0.7-0.8)a   | 41.5 (37.0-53.5)b          | 2.3 (1.5-2.7)b     | 28.0 (17.6-30.0)a  | 14.5 (13.0-15.0)a    | 0.0 (0.0-0.0)b    |
|     | NOVA 3 | 1648 (1580-1829)a    | 390 (376-436)a         | 7.3 (2.5-16.0)a        | 1.0 (0.6-5.5)a   | 60.0 (58.6-75.0)ab         | 18.0 (15.0-20.4)a  | 8.5 (5.7-9.6)ab    | 8.7 (8.0-10.0)b      | 0.3 (0.2-0.8)a    |
|     | NOVA 4 | 1685 (1596-1834)a    | 399 (377-442)a         | 6.2 (2.8-15.8)a        | 1.8 (0.6-3.9)a   | 68.0 (61.0-76.0)a          | 19.0 (15.0-24.8)a  | 6.4 (5.2-8.0)b     | 8.5 (7.9-10.8)b      | 0.5 (0.3-0.8)a    |
| WG  | NOVA 1 | 1549 (1516-1592)a    | 368 (359-376)a         | 7.0 (3.6-7.7)a         | 1.2 (0.6-1.3)a   | 59.0 (56.0-66.0)a          | 1.3 (1.0-2.0)b     | 10.0 (7.1-14.4)a   | 13.0 (12.0-14.1)a    | 0.0 (0.0-0.0)b    |
|     | NOVA 3 | 1551 (1522-1584)a    | 370 (361-375)a         | 3.4 (2.2-6.2)a         | 0.8 (0.5-1.2)a   | 65.0 (61.0-70.0)a          | 16.0 (9.9-18.9)a   | 8.2 (7.0-14.0)a    | 11.5 (11.0-13.0)a    | 0.3 (0.0-0.8)a    |
|     | NOVA 4 | 1603 (1431-1704)a    | 379 (341-405)a         | 4.6 (2.9-10.7)a        | 0.9 (0.7-2.3)a   | 59.2 (40.1-70.0)a          | 15.0 (10.0-21.5)a  | 8.2 (5.5-14.9)a    | 11.8 (8.7-14.5)a     | 0.2 (0.1-1.0)a    |

Legend: For each group, different letters in the same column after parenthesis indicate significant differences among types (Kruskal–Wallis test for independent samples with multiple pairwise comparisons,  $p < 0.05$ ). RG: refined grain; PWG: partially produced with wholegrain; WG: wholegrain; SFA, saturates.

**Supplementary Table S2.** Energy, nutrients and salt content of retrieved breakfast cereals, stratified based on tertiles of sugar, fibre and salt content and the NOVA group.

|       | NOVA      | Energy<br>(kJ/100 g) | Energy (kcal/100<br>g) | Total Fat<br>(g/100 g) | Sfa<br>(g/100 g) | Carbohydrates<br>(g/100 g) | Sugar<br>(g/100 g)  | Fibre<br>(g/100 g)  | Protein<br>(g/100 g) | Salt<br>(g/100 g)  |                  |
|-------|-----------|----------------------|------------------------|------------------------|------------------|----------------------------|---------------------|---------------------|----------------------|--------------------|------------------|
| SUGAR | Tertile 1 | NOVA 1               | 1549 (1514-1592)b      | 366 (358-377)b         | 4.3 (2.5-7.0)a   | 0.8 (0.5-1.3)a             | 61.3 (57.4-70.5)b   | 1.1 (0.7-1.5)b      | 9.4 (6.5-11.3)a      | 12.6 (11.0-14.0)a  | 0.0 (0.0-0.0)b   |
|       |           | NOVA 3               | 1574 (1570-1597)a      | 371 (370-377)a         | 1.0 (1.0-1.2)b   | 0.3 (0.2-0.3)b             | 81.0 (81.0-82.0)a   | 6.5 (6.0-6.6)a      | 3.3 (3.0-4.0)b       | 7.9 (7.3-8.0)b     | 1.0 (0.4-2.0)a   |
|       |           | NOVA 4               | 1605 (1536-1658)a      | 379 (364-392)a         | 2.6 (1.5-9.1)b   | 0.6 (0.4-1.7)a             | 71.0 (58.5-81.0)a   | 7.3 (5.7-8.8)a      | 6.6 (4.0-10.5)a      | 10.0 (8.0-12.0)a,b | 0.8 (0.1-1.4)a   |
|       | Tertile 2 | NOVA 1               | 1611 (1531-1691)a      | 383 (364-402)a         | 9.7 (7.3-12.0)a  | 1.9 (1.0-2.8)a             | 59.5 (58.0-61.0)a   | 11.5 (11.0-12.0)a   | 7.7 (4.3-11.0)a      | 11.0 (11.0-11.0)a  | 0.0 (0.0-0.0)a   |
|       |           | NOVA 3               | 1589 (1526-1792)a      | 377 (362-426)a         | 5.8 (2.1-12.7)a  | 1.0 (0.5-4.3)a             | 62.0 (58.6-75.0)a   | 17.0 (12.0-18.2)a   | 8.5 (6.0-10.1)a      | 10.0 (8.0-11.0)a   | 0.3 (0.0-0.8)a   |
|       |           | NOVA 4               | 1662 (1573-1839)a      | 393 (371-441)a         | 6.1 (2.1-16.4)a  | 1.5 (0.6-4.0)a             | 64.0 (57.1-76.0)a   | 17.0 (14.4-19.0)a   | 6.9 (5.3-8.5)a       | 9.4 (8.1-12.0)a    | 0.5 (0.2-0.8)a   |
|       | Tertile 3 | NOVA 1               | 1623 (1467-1779)a      | 386 (348-423)a         | 9.0 (5.9-12.0)a  | 1.9 (1.7-2.1)a             | 62.5 (59.0-66.0)a   | 25.0 (24.0-26.0)a   | 9.0 (6.9-11.0)a      | 9.5 (9.3-9.6)a     | 0.0 (0.0-0.0)a   |
|       |           | NOVA 3               | 1614 (1570-1756)a      | 381 (375-418)a         | 5.3 (1.5-15.0)a  | 0.8 (0.5-5.3)a             | 65.0 (60.0-85.0)a   | 24.0 (22.0-26.5)a   | 5.0 (2.6-7.5)a       | 8.5 (6.0-9.6)a     | 0.2 (0.2-0.5)a   |
|       |           | NOVA 4               | 1698 (1637-1889)a      | 402 (386-449)a         | 7.0 (3.5-15.3)a  | 2.3 (1.0-4.5)a             | 72.0 (63.0-79.0)a   | 26.0 (24.1-29.7)a   | 5.4 (3.9-6.7)a       | 8.0 (7.0-8.6)a     | 0.5 (0.2-0.8)a   |
| FIBRE | Tertile 1 | NOVA 1               | 1611 (1592-1618)a,b    | 380 (376-381)a,b       | 1.1 (1.1-4.0)a,b | 0.4 (0.4-0.5)a,b           | 82.5 (74.0-85.0)a,b | 0.5 (0.2-1.1)c      | 2.2 (0.5-3.7)b       | 7.2 (7.1-9.2)a     | 0.0 (0.0-0.0)b   |
|       |           | NOVA 3               | 1591 (1574-1605)b      | 375 (371-378)b         | 1.0 (0.9-1.2)b   | 0.3 (0.2-0.4)a             | 82.0 (81.0-84.0)a   | 6.6 (6.0-22.0)b     | 3.0 (2.6-3.3)b       | 7.3 (7.0-8.0)a     | 1.0 (0.5-2.0)a   |
|       |           | NOVA 4               | 1633 (1602-1705)a      | 385 (378-403)a         | 2.6 (1.8-5.6)a   | 0.7 (0.4-2.3)a             | 79.0 (72.0-82.0)b   | 22.0 (11.0-27.0)a   | 3.8 (3.0-4.3)a       | 7.3 (6.4-9.0)a     | 0.9 (0.5-1.1)a   |
|       | Tertile 2 | NOVA 1               | 1578 (1528-1601)b      | 374 (361-378)b         | 3.1 (2.6-5.6)b   | 0.6 (0.5-1.1)b             | 67.5 (64.5-70.5)a   | 1.8 (1.2-2.4)b      | 7.0 (6.9-7.1)a       | 14.0 (11.5-14.5)a  | 0.0 (0.0-0.0)b   |
|       |           | NOVA 3               | 1632 (1565-1792)a,b    | 385 (373-426)a,b       | 7.6 (2.3-15.0)a  | 1.0 (0.6-5.3)a,b           | 63.8 (60.5-73.0)a   | 16.1 (10.1-23.7)a   | 6.9 (6.0-7.5)a       | 10.3 (8.2-11.0)a,b | 0.2 (0.0-0.8)a   |
|       |           | NOVA 4               | 1754 (1641-1890)a      | 418 (386-450)a         | 12.5 (4.1-17.0)a | 2.8 (1.0-4.5)a             | 66.0 (61.0-75.9)a   | 22.0 (18.0-26.0)a   | 6.3 (5.6-6.8)a       | 8.5 (8.0-9.4)b     | 0.4 (0.1-0.7)a   |
|       | Tertile 3 | NOVA 1               | 1528 (1478-1554)b      | 363 (348-369)b         | 7.0 (3.1-7.0)a   | 1.2 (0.8-1.3)b             | 59.0 (57.0-61.0)a   | 1.1 (0.7-1.9)b      | 10.1 (9.5-13.0)a     | 13.0 (11.8-14.0)a  | 0.0 (0.0-0.0)b   |
|       |           | NOVA 3               | 1538 (1515-1812)a,b    | 364 (360-432)a,b       | 5.7 (2.4-16)a    | 1.0 (0.6-5.2)a,b           | 60.4 (58.0-65.0)a   | 17.5 (11.0-18.9)a   | 9.8 (8.9-14.0)a      | 10.0 (9.6-12.0)b   | 0.2 (0.0-0.8)a   |
|       |           | NOVA 4               | 1646 (1490-1794)a      | 391 (353-428)a         | 7.8 (3.8-15.5)a  | 1.7 (0.7-3.8)a             | 60.7 (51.0-65.0)a   | 16.0 (10.0-19.0)a   | 9.4 (8.4-14.0)a      | 11.0 (9.0-13.0)b   | 0.4 (0.1-0.7)a   |
| SALT  | Tertile 1 | NOVA 1               | 1545 (1514-1601)b      | 367 (358-378)b         | 5.0 (2.6-7.0)b   | 0.9 (0.5-1.3)b             | 60.7 (57.4-69.0)a   | 1.1 (0.7-2.0)b      | 9.5 (6.9-11.3)a      | 12.0 (11.0-14.0)a  | 0.0 (0.0-0.0)b   |
|       |           | NOVA 3               | 1565 (1515-1673)b      | 372 (360-396)b         | 6.4 (5.6-8.9)a,b | 1.1 (0.9-2.8)a,b           | 60.7 (58.6-64.0)a   | 20.0 (11.0-24.0)a   | 7.5 (6.9-9.6)a,b     | 10.1 (9.6-12.3)a,b | 0.0 (0.0-0.0)b   |
|       |           | NOVA 4               | 1709 (1636-1884)a      | 407 (389-450)a         | 12.5 (5.0-18)a   | 2.5 (1.4-4.5)a             | 62.5 (58.0-72.0)a   | 18.4 (13.1-26.0)a   | 7.0 (6.0-8.4)b       | 9.9 (8.5-11.0)b    | 0.1 (0.0-0.1)a   |
|       | Tertile 2 | NOVA 1               | 1522 (1478-1566)a      | 367 (349-372)a         | 4.8 (2.6-7.0)a   | 0.8 (0.2-1.3)a             | 61.6 (59.1-64.0)a   | 1.1 (1.0-1.1)b      | 9.3 (8.4-10.2)a      | 13.2 (13.0-13.3)a  | 0.2 (0.2-0.2)a,b |
|       |           | NOVA 3               | 1614 (1570-1820)a      | 381 (372-434)a         | 2.2 (1.4-16.0)a  | 0.6 (0.3-5.3)a             | 66.0 (59.0-81.0)a   | 17.0 (6.5-22.0)a    | 7.6 (4.0-8.9)a       | 8.7 (7.2-10.0)b    | 0.3 (0.2-0.4)b   |
|       |           | NOVA 4               | 1758 (1625-1882)a      | 419 (385-449)a         | 13.0 (3.8-17.0)a | 2.5 (1.0-4.5)a             | 64.1 (61.0-76.0)a   | 22.0 (16.3-26.0)a   | 6.2 (5.1-8.0)a       | 8.2 (7.0-8.9)b     | 0.4 (0.3-0.5)a   |
|       | Tertile 3 | NOVA 1               | 1555 (1554-1555)a      | 366 (366-366)a         | 4.1 (1.0-7.1)a   | 0.8 (0.2-1.4)a             | 72.0 63.0-81.0)b    | 0.7 (0.5-0.8)b      | 3.5 (2.0-5.0)a       | 10.0 (7.3-12.6)a   | 1.8 (1.0-2.5)a   |
|       |           | NOVA 3               | 1589 (1570-1604)a      | 375 (370-378)a         | 1.2 (1.0-2.1)b   | 0.3 (0.2-0.5)b             | 81.0 (75.0-83.0)a   | 8.5 (6.1-16.1)a     | 3.3 (3.0-6.0)a       | 8.0 (7.3-8.5)a     | 1.0 (0.9-2.0)a   |
|       |           | NOVA 4               | 1613 (1566-1665)a      | 380 (370-393)a         | 2.8 (1.8-5.8)b   | 0.7 (0.4-2.1)a             | 75.0 (69.0-81.0)b   | 18.0 (10.9-25.0)a,b | 4.8 (3.5-6.9)a       | 8.3 (7.3-11)a      | 1.0 (0.8-1.3)a   |

Legend: For each group, different letters in the same column after parenthesis indicate significant differences among types (Kruskal–Wallis test for independent samples with multiple pairwise comparisons,  $p < 0.05$ ). SFA, saturates.
